# Supplementary material for: WWOX Possesses N-Terminal Cell Surface-Exposed Epitopes WWOX7-21 and WWOX7-11 for Signaling Cancer Growth Suppression and Prevention In Vivo
Source: Cancers (Basel). 2019 Nov 19;11(11):1818. doi: 10.3390/cancers11111818 (PMC6895976; doi:10.3390/cancers11111818)
Supplement: Supplementary file 1 [file cancers-11-01818-s001.zip]

Archive with 6 entries (6 files):
- supple.pdf
- Video S1 4t1_prebled serum_30min pre_ceritinib30uM.mp4
- Video S2.4t1_wwox286299Ab_pretreat30min_ceritinib30uM.mp4
- Video S3 4t1_wwox721Ab_pretreat30min_ceritinib30uM.mp4
- Video S4 4T1 Ceritinib 30 uM rm temp 10 min frame.mp4
- Video S5 4T1 wox1 7-21 30 uM Ceritinib 30 uM rm temp.mp4
